# Supplementary material
Source: publisher figshare collection journal article supplement (https://acs.figshare.com/ndownloader/files/4171264)
Supplement: Supplementary file 1 [file 4171264]

## Supporting Information

Figure S1: Morphological images of gold nanoshells after assembly.

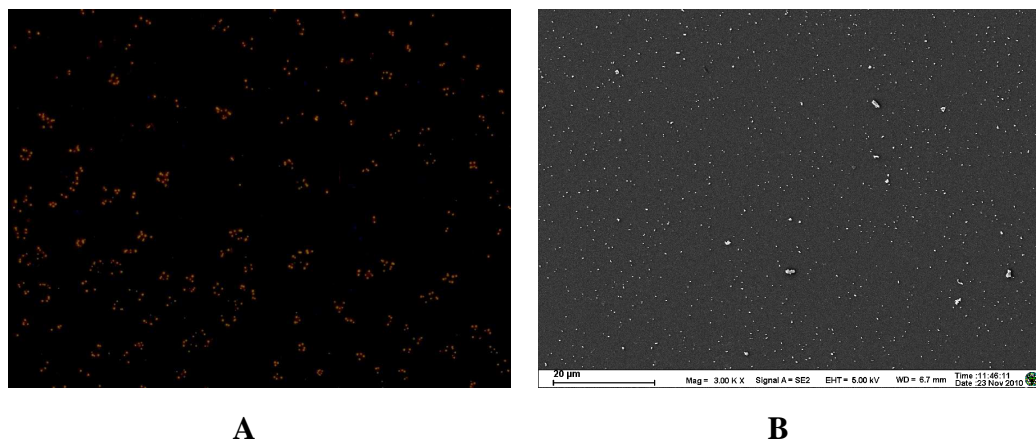

Figure S1: Morphological images of gold nanoshells after assembly. **A**, optical image ( $\times 200$ ) of assemblies under 100KHz alternating magnetic field on the glass substrate. **B**, SEM image of assemblies under 50KHz alternating magnetic field on the Si substrate.

Figure S2: Impedance measurement of Si wafer as the substrate.

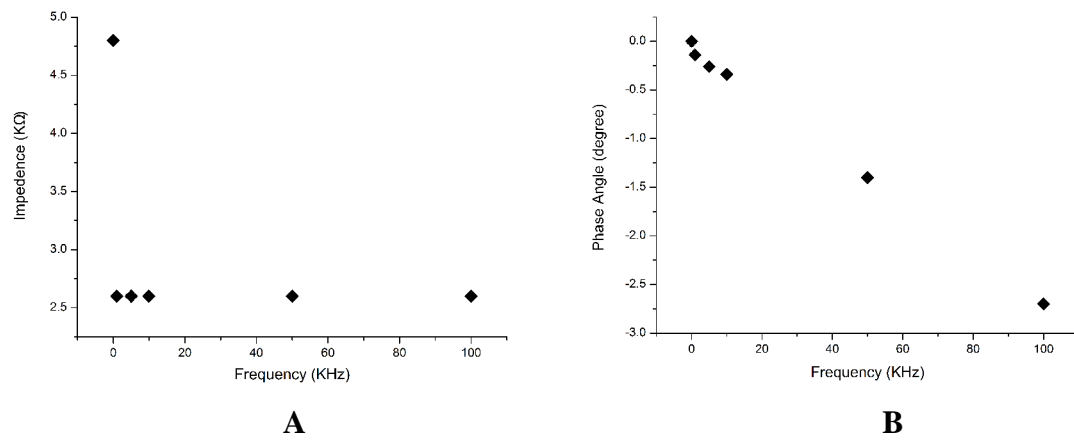

Figure S2: Impedance measurement of Si wafer as the substrate. **A**, amplitude of impedance. **B**, phase angle of impedance.

Figure S3: Measurements of DLS and  $\zeta$  potential for nanoshells with ion amount decreasing.

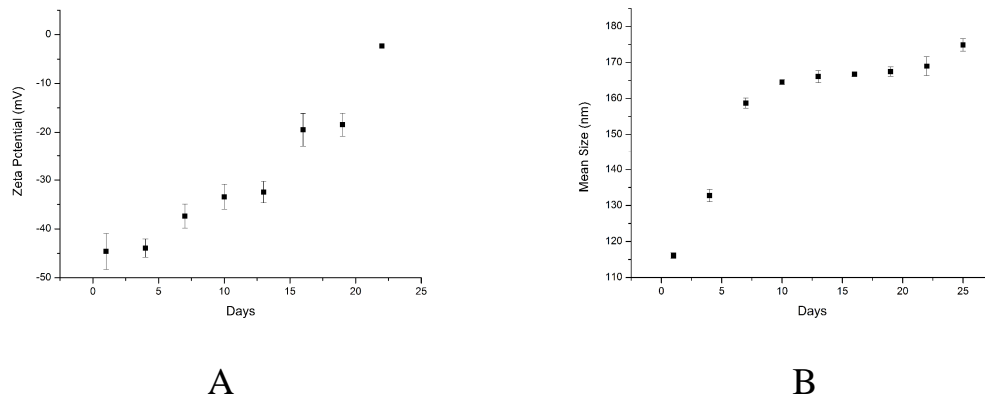

Figure S3: measurements of  $\zeta$  potential and DLS for nanoshells with ion amount decreasing (The ion amount decreased every 3 days, hence the number of days was used as the abscissa). **A**,  $\zeta$  potential. **B**, DLS.

Figure S4: SEM image of 40nm hollow Au nanoshells

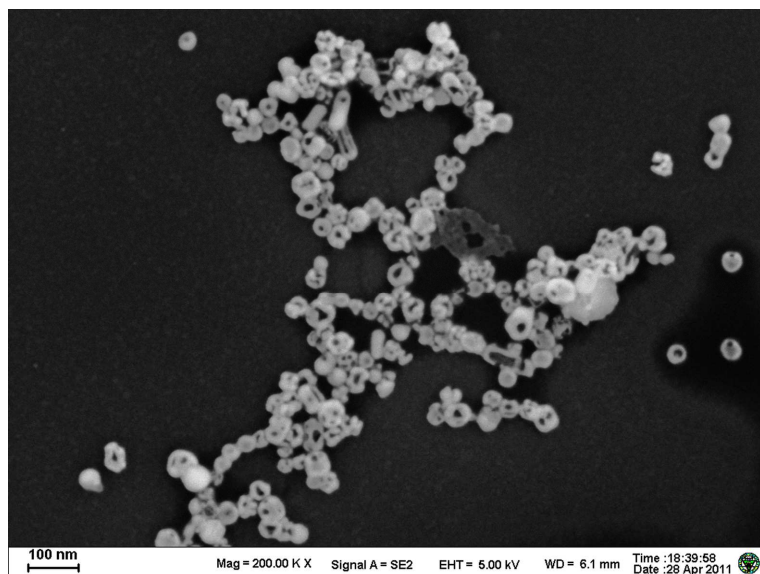

Figure S4: SEM image of 40nm hollow Au nanoshells.

Figure S5: mean size and  $\zeta$  potential of 10nm Au nanoparticulate aggregates

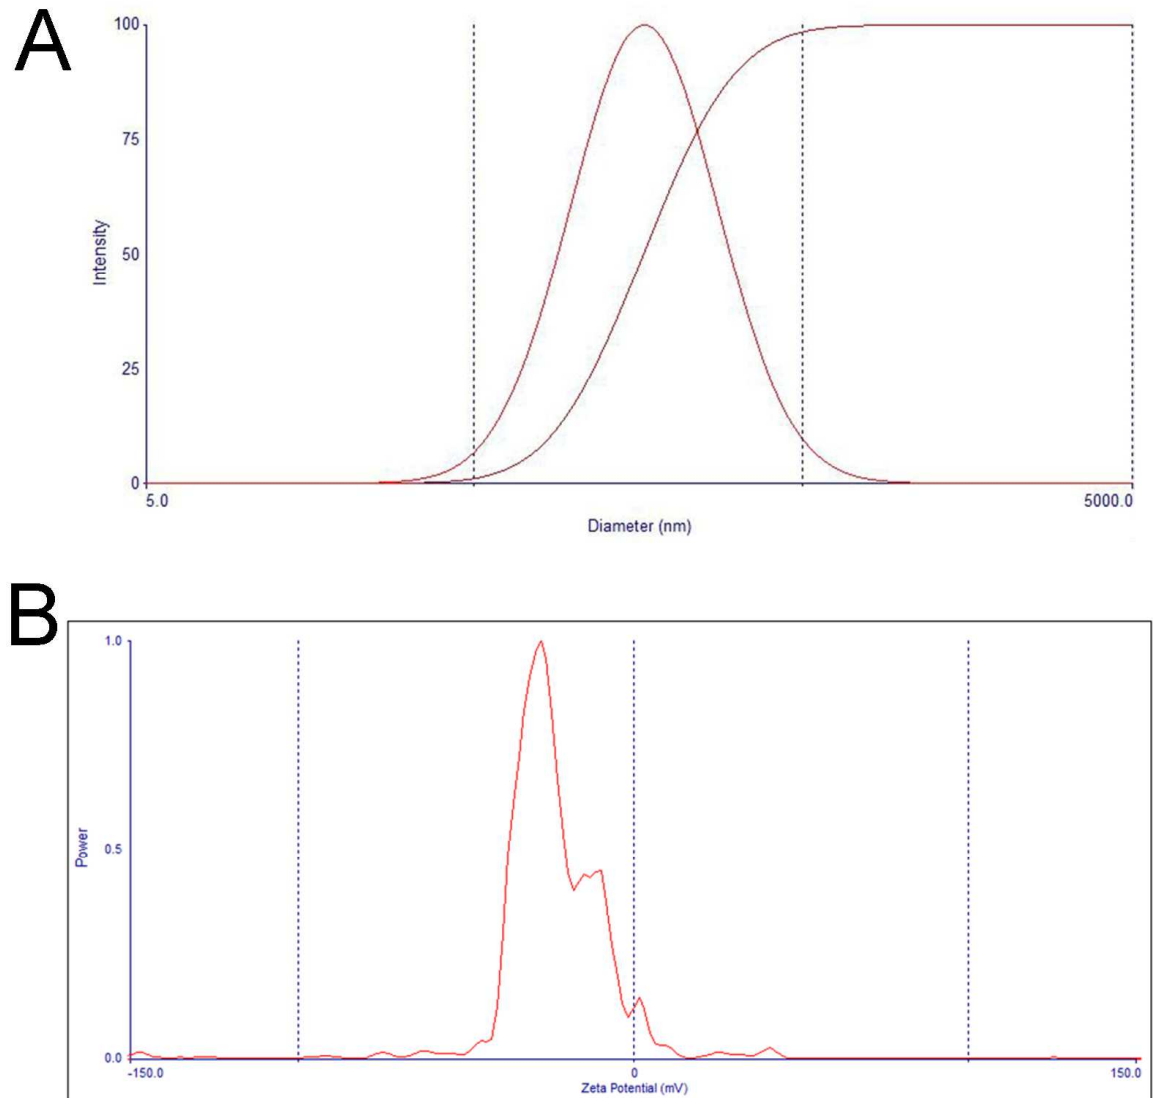

Figure S5: **A**, mean size of 10 nm colloidal gold aggregates characterized by DLS. **B**,  $\zeta$  potential of 10nm Au nanoparticulate aggregates.

Figure S6: the morphological images of gold nanoshells with different concentrations after natural drying

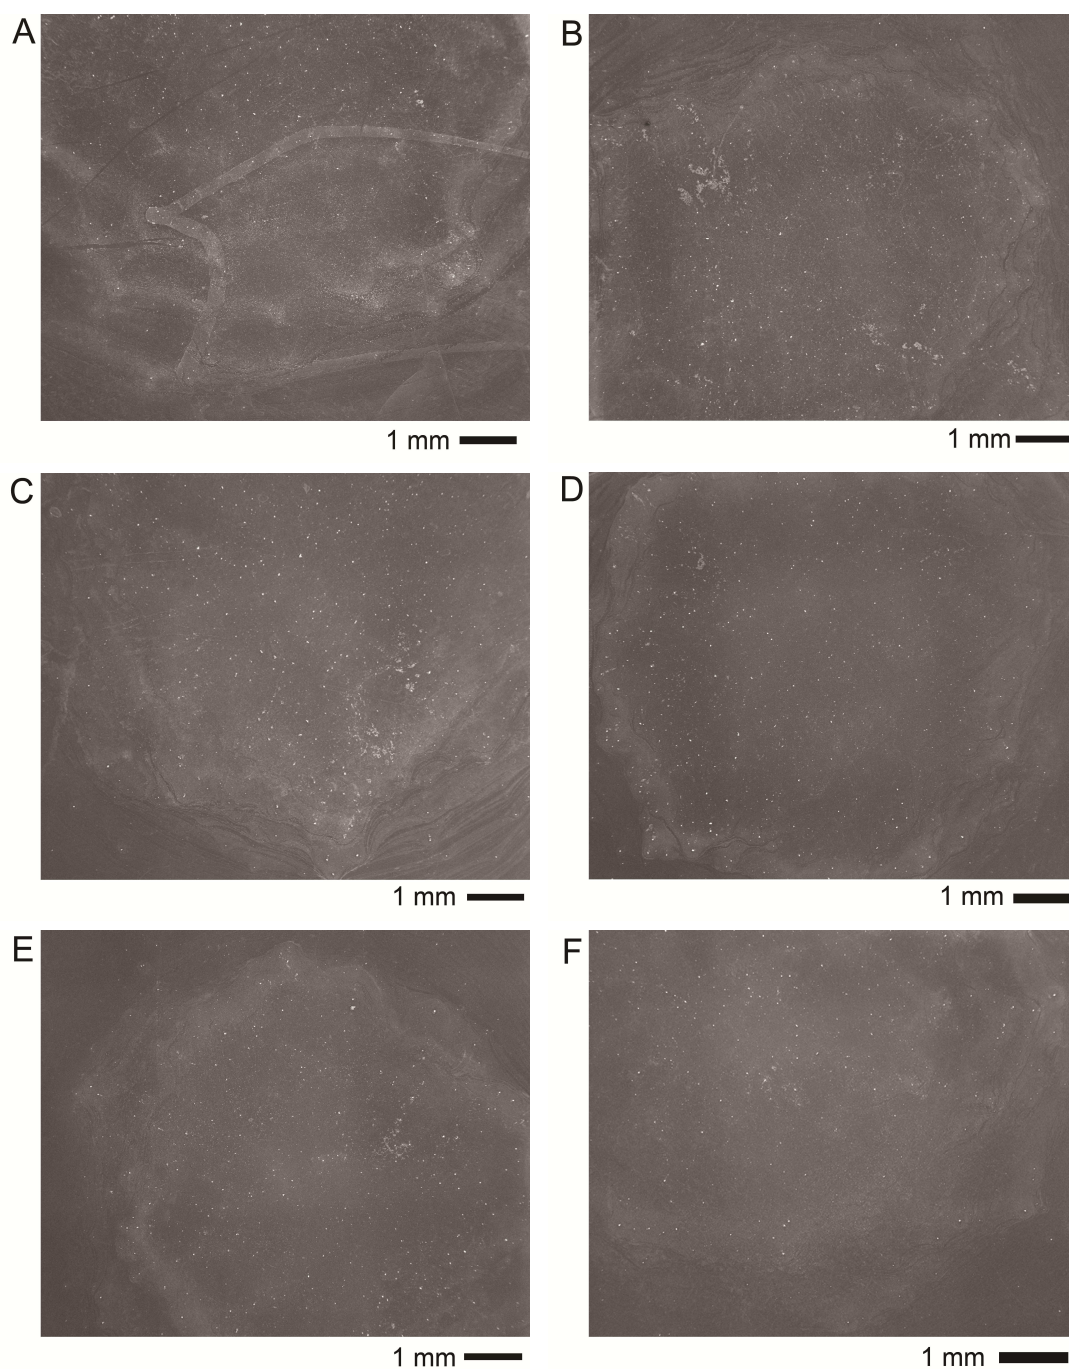

Figure S6: the morphological images of gold nanoshells with different concentrations after natural drying. **A~F:** 66.7 $\mu\text{g/ml}$ , 33.4 $\mu\text{g/ml}$ , 22.3 $\mu\text{g/ml}$ , 16.7 $\mu\text{g/ml}$ , 13.4 $\mu\text{g/ml}$  and 11.1 $\mu\text{g/ml}$ , respectively.

Figure S7: the pattern formation of gold nanorods mediated by the alternating magnetic field

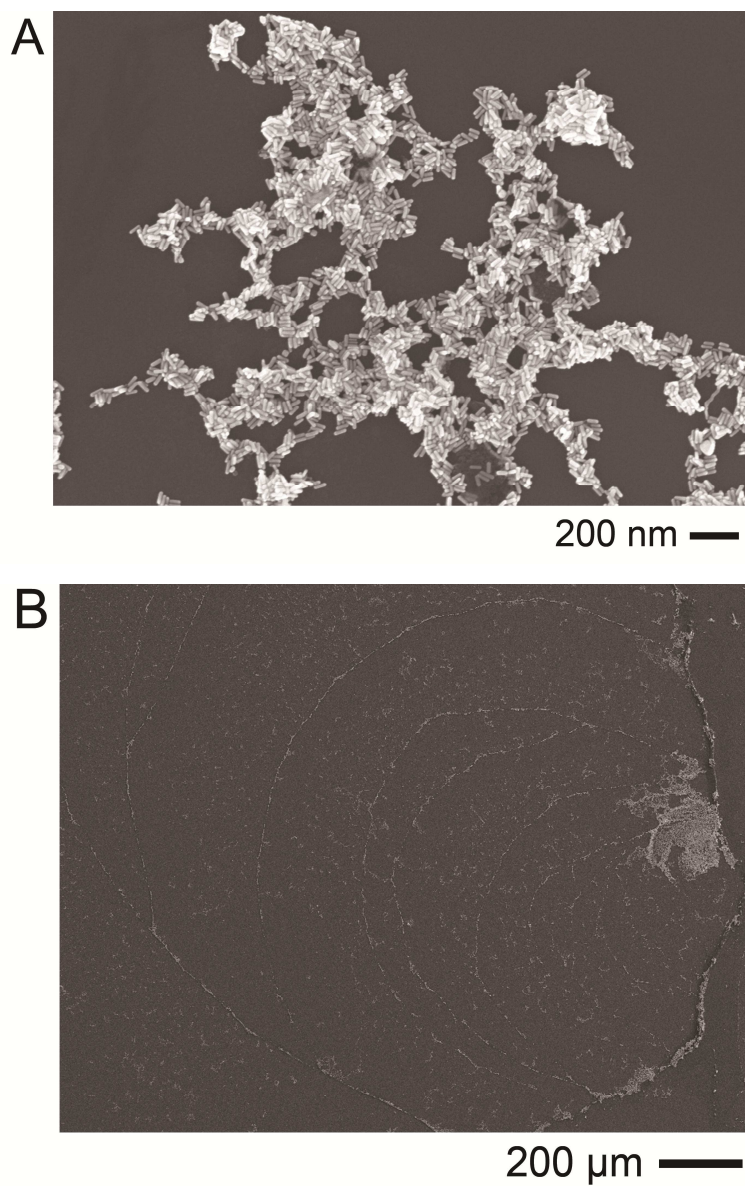

Figure S7: the pattern formation of gold nanorods mediated by the alternating magnetic field. **A**, the as-synthesized Au nanorods. **B**, the vortex-like pattern after the treatment of 100KHz alternating magnetic field.

Movie S1: <http://dl.dropbox.com/u/53669185/Mov.%20S1.avi>.

Movie S2: <http://dl.dropbox.com/u/53669185/Mov.%20S2.avi>.
